# Supplementary material
Source: MDPI journal article supplement (https://www.mdpi.com/2673-4591/6/1/6)
Supplement: s1 [file s1]

**Study of the effect of bending deformation on the performance of flexible polymer layered humidity sensor.**

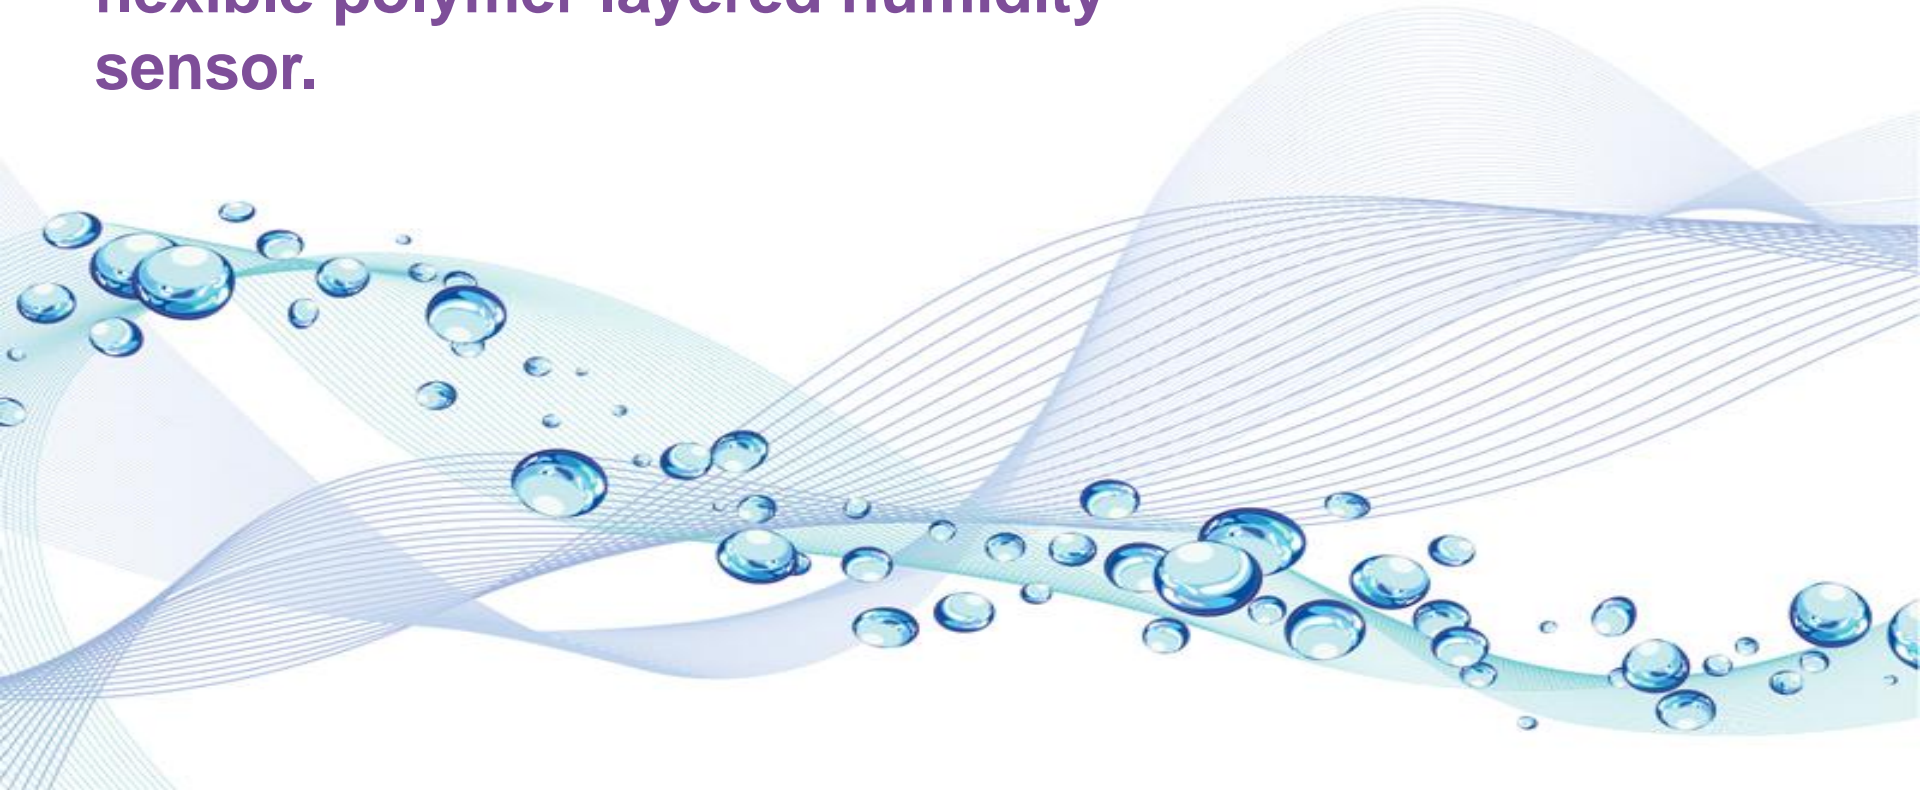

# Authors

Katerina Lazarova<sup>1</sup>, Silvia Bozhilova<sup>2</sup>, Sijka Ivanova<sup>2</sup>, DarinkaChristova<sup>2</sup>, Tsvetanka Babeva<sup>1</sup>

<sup>1</sup>Institute of Optical Materials and Technologies “Acad. J. Malinowski”, Bulgarian Academy of Sciences, Akad. G. Bonchev str., bl. 109, 1113 Sofia, Bulgaria; klazarova@iomt.bas.bg (K.L.); babeva@iomt.bas.bg (T.B.)

<sup>2</sup>Institute of Polymers, Bulgarian Academy of Sciences, Akad. G. Bonchev Str., bl. 103-A, 1113 Sofia, Bulgaria; dchristo@polymer.bas.bg (D. Ch.)



# Table of content

- ✓ *Introduction*
- ✓ *Copolymer synthesis*
- ✓ *Copolymer characterization*
- ✓ *Thin film deposition*
- ✓ *Optical characterization*
- ✓ *Humidity sensing and bending experiments*
- ✓ *Summary*

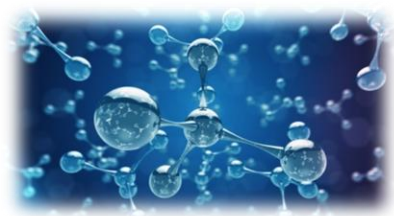

# Introduction

## WHY HUMIDITY?

- ✓ Relative humidity can affect the incidence of respiratory infections and allergies.
- ✓ By exposure to relative humidity between 40% and 70% the survival of airborne viruses and infectious bacteria is minimized.
- ✓ For the wound healing process to accelerate, the wound should be kept moist - the moisture of the wound is made a key parameter in the development of patches.
- ✓ Atmospheric humidity affects the sense of comfort and is also an important parameter for ensuring optimum exploitation of warehouses for food and non-food goods, building materials, museum artifacts, etc.

## WHY OPTICAL SENSING?

- ✓ Traditional humidity sensors are based on the electrical measurement and suffer from high working temperature, lack of selectivity and relatively low accuracy due to the cross-temperature feature.
- ✓ Optical sensing, where detection is based on change of color of the thin film for example in response to particular analyte, offers simple and power saving method.



# Introduction

## Why polymers?

Great variety of materials that change their refractive index, extinction coefficient or thicknesses are implemented as sensitive media but polymers are a material that stands out.

Easy deposition in form of thin films

Relatively low cost

Tailored functionality

Fast response due to the short diffusion path length

## What we do?

- ✓ Hydrophobically modified PVA copolymer, namely poly(vinyl alcohol-co-vinyl acetal), is synthesized and used in a form of nanometer-sized thin films deposited on PET flexible substrate as well as borosilicate glass by spin-coating method.
- ✓ PET flexible substrate and borosilicate glass were covered with Au:Pd sublayer with gold-palladium ratio of 80:20 and thickness of 30 nm before polymer deposition.
- ✓ Samples are thermally treated in air at 60°C after polymer film was deposited.
- ✓ The effect of bending deformation on the performance of flexible polymer layered humidity sensor is investigated.



# Copolymer synthesis

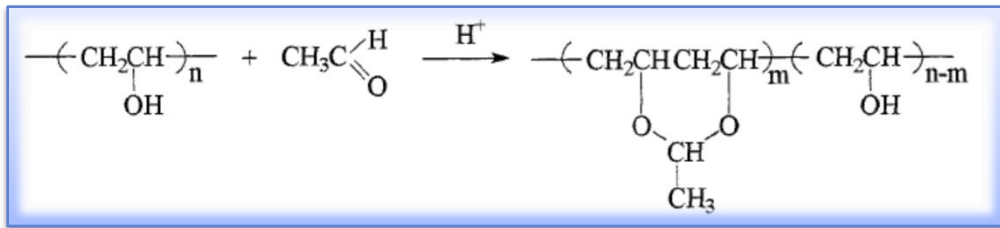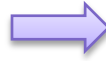

- Poly(vinylalcohol-co-vinylacetal)s of varied copolymer composition were synthesized at mild reaction conditions in aqueous media at 30°C.
- The copolymer composition was controlled by PVA-to-acetaldehyde molar ratio.

- Obtained poly(vinylalcohol-co-vinylacetal)s are smart materials exhibiting reversible phase transition in aqueous solution with increasing temperature.
- The higher the acetal content, the higher the hydrophobicity and the lower the phase transition temperature, respectively.

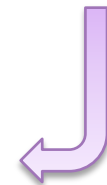



# Thin film deposition

- Spin coating: 0.250 ml drop, speed - 4000 rpm, time - 60s
- Postdeposition annealing: 30 min in air,  $T = 60^{\circ}\text{C}$  and  $180^{\circ}\text{C}$
- Substrates: Si-wafer
- Thickness: all films have thickness around 80 nm

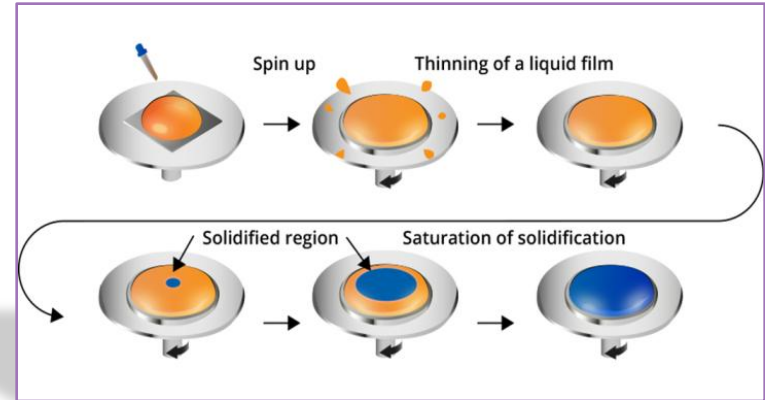

Thin films from polymer of 24% acetal content were deposited with approximate thickness of 80 nm on PET flexible substrate by the method of spin coating using 0.250 ml of 1 wt% solution of polymers in 80:20 volume ratio of methanol-to-water solvent.



# Thin film deposition

## Performing bending:

- After making all measurements of the PET substrate covered with polymer film four groups bend deformations take place.
- After each set of bends same measurements were conducted.
- Numbers of bend deformations performed: 25, 100, 200 and 1000.
- Bend radius  $R_b = 4.37$  mm

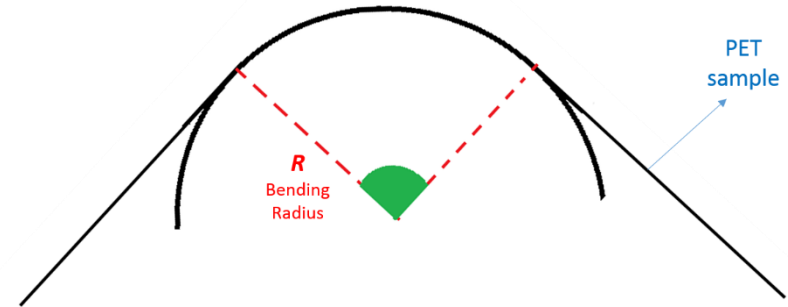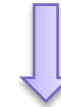

$$R_b = 4.37 \text{ mm}$$





# Optical characterization

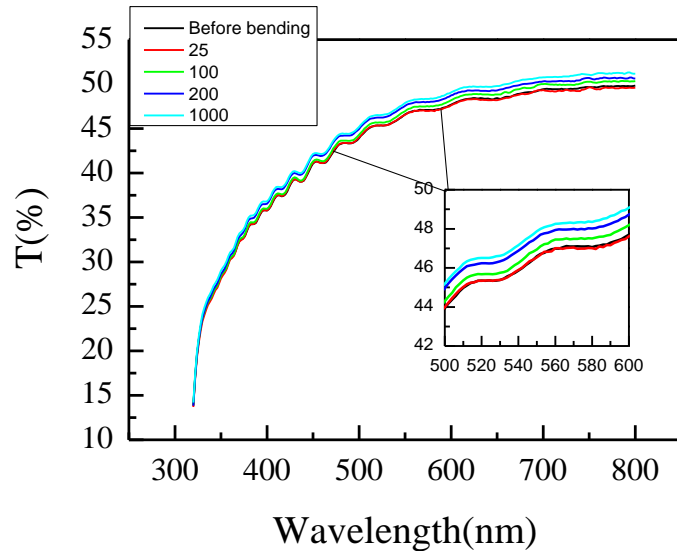

- It is seen from measured transmittance spectra that the transmittance coefficient  $T$  increases with the increase of the number of bends.
- The transmission coefficient  $T$  at 600 nm wavelength after 25 bends is 47.6 % and gradually increases to 49.1 % after 1000 deformations.
- The possible reason of the observed slight increase in  $T$  is the change of transmittance of the metal overlayer due to small sub-micron cracks created as a result of bending deformations.



# Humidity sensing and bending experiments

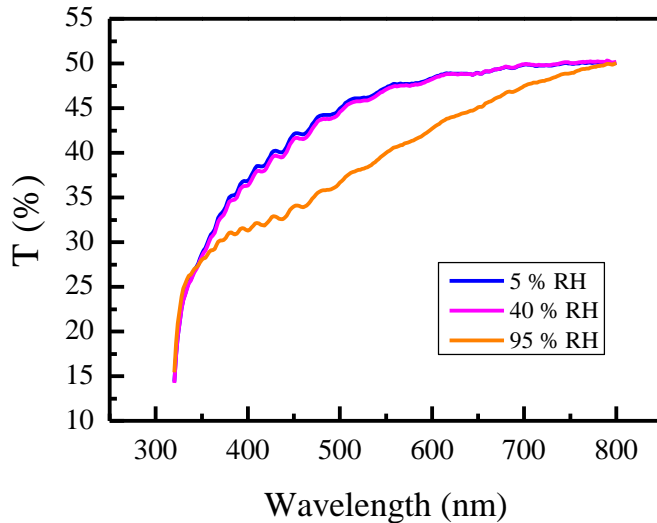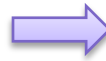

Transmittance spectra  $T$  for humidity levels of 5 %, 40 % and 95 % RH of sample after each set of bends were measured.

When polymer film is exposed to higher humidity it increases its thickness and decreases its refractive index. As a result a change in transmittance spectra is observed.

Transmittance change  $\Delta T$  is calculated for each set of bends.

For the highest humidity (94 %) the spectrum shifts toward higher wavelengths and similar values of  $\Delta T$  around  $7 \pm 1$  % at 500 nm wavelength are measured after all bending deformations for the flexible PET sensor.



# Humidity sensing and bending experiments

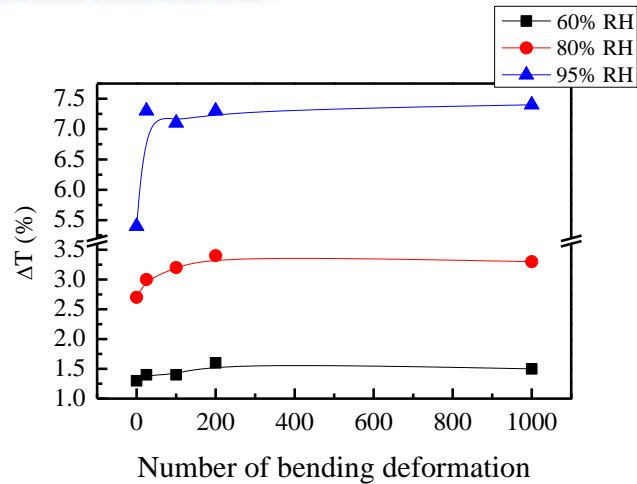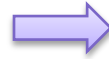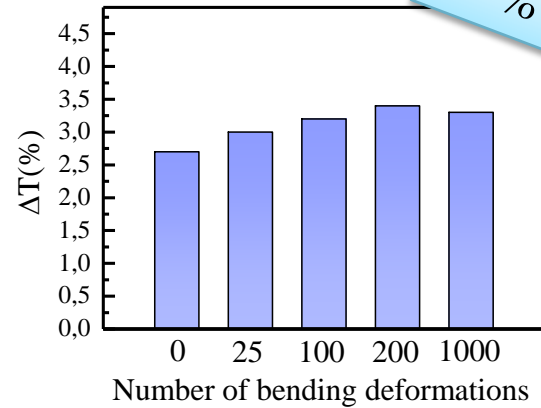

Transmittance change  $\Delta T$  is calculated for each set of bends and for three different humidity levels – 60 %, 80 % and 95 % RH.

For the highest humidity (95 %) similar values of  $\Delta T$  around  $7 \pm 1$  % at 500 nm wavelength are measured after all bending deformations for the flexible PET sensor.

There is a slight increase of polymer swelling with bending deformation mostly pronounced for the highest humidity levels.



# Summary

- ✓ A humidity-sensitive system of a flexible metalized PET substrate and a Poly(vinylalcohol-*co*-vinylacetal) copolymer thin film has been successfully developed.
- ✓ A change in the transmittance spectrum after exposure to different relative humidity levels in the whole range of 5-95% RH was observed.
- ✓ Series of deformation bends from 25 to 1000 led to a slight increase of transmission
- ✓ The measured change  $\Delta T$  after each set of bends was about 7% and depends slightly of the number of bending deformations up to 1000. However the comparison with  $\Delta T$  before bending showed an increase of polymer swelling mostly pronounced for the highest humidity levels.

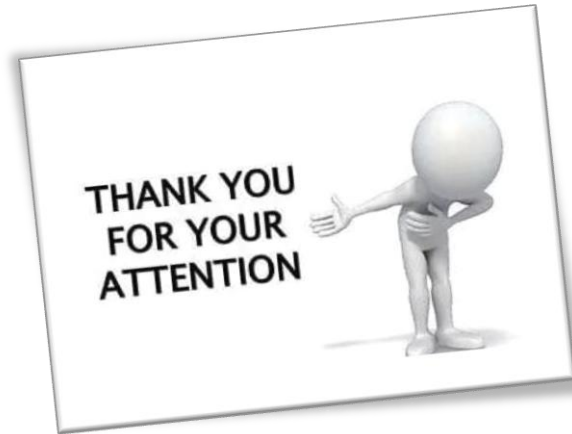

### ***Acknowledgments:***

K. Lazarova and S. Bozhilova acknowledge the National Scientific Program for young scientists and postdoctoral fellows, funded by the Bulgarian Ministry of Education and Science (MES) with DCM 577/2018 and 271/2019.

Research equipment of Distributed Research Infrastructure INFRAMAT, part of Bulgarian National Roadmap for Research Infrastructures, supported by Bulgarian Ministry of Education and Science was used in this investigation.
